# Supplementary material
Source: bioRxiv or medRxiv preprint supplement (https://www.biorxiv.org/highwire/filestream/3441/field_highwire_adjunct_files/8/013631-2.pdf)

1 2 3 4 5 6 7 8 9 10 11 12 13

14 15 16 17 18 19 20 21

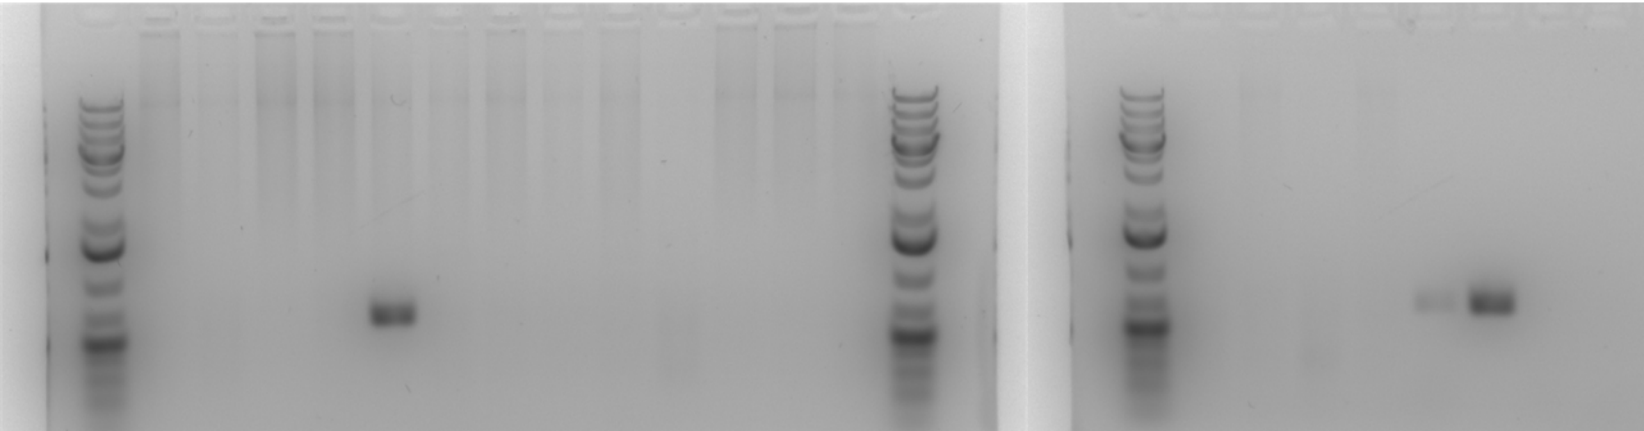

Supplement: Supplementary file [file 013631-2.pdf]
